# Supplementary material for: A plug and play microfluidic deviceElectronic supplementary information (ESI) available: mpg files showing flow patterns. See http://www.rsc.org/suppdata/lc/b3/b301410j/
Source: Royal Society of Chemistry journal article supplement (doi:10.1039/b301410j), 2003-01-01
Supplement: b301410j.doc [file b301410j.doc]

###### Electronic Supplementary Information (ESI): legends

Movie S1, S2, S3

**Movie S1.** A video clip of the initial step to form a laminar flow pattern. Introduction of the red and blue solutions are synchronized by the capillary valves in the branched channels. Wider channels are 100m wide and 150m high, and the narrower channels for the capillary valves are 25m wide, 150m high and 100m long. The solutions are first introduced at 50Pa, and are stopped at the position of the valves. Then, the pressure was increased up to 3kPa to break the valves.

**Movie S2.** A video clip of flow width control by changing the pressure generated by the micropumps. Channel dimension is the same as Movie S1. Keeping the pumping pressure for the blue solution at 1.4kPa, the pressure for the red one was changed sequentially from1.4kPa, 2.0kPa, 0.8kPa, 2.0kPa, to 1.4kPa. The ratio of the flow width can be controlled easily by this operation.

**Movie S3.** A video clip showing an example of alternative pulsed flow. Wider channels are 150m wide and 150m high, and narrow channels are 30m wide, 150m high, and 500m long before the junction point and 400m after the junction point. The frequency for the alternative switching is set at 5Hz to visualize the thin skins generated by this operation.
